# Supplementary material for: A Mathematical Radiobiological Model (MRM) to Predict Complex DNA Damage and Cell Survival for Ionizing Particle Radiations of Varying Quality
Source: PubMed Central journal article supplement (PMC7914858; doi:10.3390/molecules26040840), 2021-02-05
Supplement: molecules-26-00840-s001.pdf [file molecules-26-00840-s001.pdf]

Supplementary information

# A Mathematical Radiobiological Model (MRM) to Predict Complex DNA Damage and Cell Survival for Ionizing Particle Radiations of Varying Quality

Spyridon A. Kalospyros <sup>1</sup>, Zacharenia Nikitaki <sup>1</sup>, Ioanna Kyriakou <sup>2</sup>, Michael Kokkoris <sup>1</sup>,  
Dimitris Emfietzoglou <sup>2</sup> and Alexandros G. Georgakilas <sup>1,\*</sup>

<sup>1</sup> Physics Department, School of Applied Mathematical and Physical Sciences, National Technical University of Athens (NTUA), 15780 Zografou, Greece; spkals@central.ntua.gr (S.A.K.); znikitaki@mail.ntua.gr (Z.N.); kokkoris@central.ntua.gr (M.K.)

<sup>2</sup> Medical Physics Lab, Department of Medicine, University of Ioannina, 45110 Ioannina, Greece; ikyriak@uoi.gr (I.K.); demfietz@uoi.gr (D.E.)

\* Correspondence: alexg@mail.ntua.gr; Tel.: +30-210-772-4453

---

## APPENDIX A

In our MRM methodology, we have used the ion's LET as an input parameter. As referred above, to a first approximation, in the case of ions, the linear energy transfer (LET) can be considered identical to the stopping power  $S_e$ . Also, as explained, according to the dielectric formalism [139], through the kinetic energy  $T$  of an ion-projectile, one can calculate their total ionization cross sections (TICS) in liquid water. And since the latter represent the number  $\frac{dNe}{d\zeta}$  of secondary electrons emitted per unit length  $\zeta$  from the ion's path, we may combine the values of these 3 quantities ( $T$ ,  $S_e$  and  $\frac{dNe}{d\zeta}$ ) in a table for all the ions that we have used.

In **Table S1** are shown the values of the kinetic energy  $T$  (MeV), the stopping power  $S_e$  (eV/nm) and the number of secondary electrons ( $e^-$ ) ejected per nm of the ion's path for all the ions used in this paper (protons,  $^{12}\text{C}$ ,  $^{11}\text{B}$ ,  $^{14}\text{N}$ ,  $^{16}\text{O}$ ,  $^{20}\text{Ne}$ ,  $^{40}\text{Ar}$ ,  $^{28}\text{Si}$  and  $^{56}\text{Fe}$ ).

We have used the data for protons and carbon ions in liquid water from the appendix of ICRU Report 90 [150] and the corresponding data for the rest of the heavy ions (except for  $^{56}\text{Fe}$ ) from the ICRU Report 73 [151] while the data for  $^{56}\text{Fe}$  have been taken from SRIM 2008 [152].

Therefore, knowing the ion's energy, we also know their stopping power, as well as the number  $\frac{dNe}{d\zeta}$  of secondary electrons emitted per unit length of an ion's path.

**Table S1:** The values of the kinetic energy  $T$  (MeV), the stopping power  $S_e$  (eV/nm) and the number of secondary electrons ejected per nm of the ion's path ( $\frac{dNe}{d\zeta}$ ) for all the ions used in this paper (protons,  $^{12}\text{C}$ ,  $^{11}\text{B}$ ,  $^{14}\text{N}$ ,  $^{16}\text{O}$ ,  $^{20}\text{Ne}$ ,  $^{40}\text{Ar}$ ,  $^{28}\text{Si}$  and  $^{56}\text{Fe}$ ). The columns of  $T$  and  $S_e$  for protons and carbon ions have been taken from ICRU Report 90, [150] the corresponding ones for the ions  $^{11}\text{B}$ ,  $^{14}\text{N}$ ,  $^{16}\text{O}$ ,  $^{20}\text{Ne}$ ,  $^{40}\text{Ar}$  and  $^{28}\text{Si}$  are from ICRU Report 73 [151] and for  $^{56}\text{Fe}$  are from SRIM 2008 [152].

| 14N     |            |                       | 20Ne    |            |                       | 28Si    |            |                       |
|---------|------------|-----------------------|---------|------------|-----------------------|---------|------------|-----------------------|
| T (MeV) | Se (eV/nm) | dNe/d $\zeta$ (e-/nm) | T (MeV) | Se (eV/nm) | dNe/d $\zeta$ (e-/nm) | T (MeV) | Se (eV/nm) | dNe/d $\zeta$ (e-/nm) |
| 0.35025 | 4.481E+02  | 0.897721971           | 0.5045  | 5.172E+02  | 1.195315893           | 0.70225 | 5.893E+02  | 1.557904905           |
| 0.4203  | 4.974E+02  | 1.45410518            | 0.6054  | 5.785E+02  | 1.945185836           | 0.8427  | 6.570E+02  | 2.54415951            |
| 0.5604  | 5.848E+02  | 3.187331614           | 0.8072  | 6.917E+02  | 4.298818497           | 1.1236  | 7.852E+02  | 5.657411074           |
| 0.7005  | 6.603E+02  | 5.39011584            | 1.009   | 7.932E+02  | 7.321670045           | 1.4045  | 9.055E+02  | 9.687663858           |
| 0.8406  | 7.261E+02  | 7.186697061           | 1.2108  | 8.847E+02  | 9.824331767           | 1.6854  | 1.018E+03  | 13.06197324           |
| 0.9807  | 7.838E+02  | 8.459957705           | 1.4126  | 9.674E+02  | 11.63203491           | 1.9663  | 1.123E+03  | 15.53368986           |
| 1.1208  | 8.343E+02  | 9.373608998           | 1.6144  | 1.042E+03  | 12.9572118            | 2.2472  | 1.221E+03  | 17.37392276           |
| 1.2609  | 8.781E+02  | 10.05030914           | 1.8162  | 1.110E+03  | 13.961769             | 2.5281  | 1.311E+03  | 18.79208334           |
| 1.401   | 9.161E+02  | 10.5649952            | 2.018   | 1.172E+03  | 14.74523947           | 2.809   | 1.396E+03  | 19.91748748           |
| 2.1015  | 1.037E+03  | 11.88598806           | 3.027   | 1.395E+03  | 16.92251425           | 4.2135  | 1.737E+03  | 23.21165954           |
| 2.802   | 1.087E+03  | 12.30176922           | 4.036   | 1.518E+03  | 17.80029769           | 5.618   | 1.962E+03  | 24.72452044           |
| 3.5025  | 1.105E+03  | 12.37608717           | 5.045   | 1.582E+03  | 18.15689348           | 7.0225  | 2.106E+03  | 25.49386241           |
| 4.203   | 1.106E+03  | 12.29377355           | 6.054   | 1.614E+03  | 18.25621058           | 8.427   | 2.197E+03  | 25.87943444           |
| 5.604   | 1.088E+03  | 11.93148027           | 8.072   | 1.630E+03  | 18.08889349           | 11.236  | 2.286E+03  | 26.06804263           |
| 7.005   | 1.059E+03  | 11.47896984           | 10.09   | 1.618E+03  | 17.70791779           | 14.045  | 2.316E+03  | 25.87844934           |
| 8.406   | 1.028E+03  | 11.01457262           | 12.108  | 1.595E+03  | 17.2487813            | 16.854  | 2.317E+03  | 25.51761475           |
| 9.807   | 9.954E+02  | 10.56546146           | 14.126  | 1.566E+03  | 16.76628408           | 19.663  | 2.304E+03  | 25.0756836            |
| 11.208  | 9.641E+02  | 10.14109354           | 16.144  | 1.535E+03  | 16.28494533           | 22.472  | 2.282E+03  | 24.59697258           |
| 12.609  | 9.338E+02  | 9.744010397           | 18.162  | 1.503E+03  | 15.81619283           | 25.281  | 2.256E+03  | 24.10495343           |
| 14.01   | 9.050E+02  | 9.373904454           | 20.18   | 1.471E+03  | 15.36525813           | 28.09   | 2.228E+03  | 23.61262797           |
| 21.015  | 7.807E+02  | 7.867907638           | 30.27   | 1.321E+03  | 13.40954696           | 42.135  | 2.072E+03  | 21.31588998           |
| 28.02   | 6.845E+02  | 6.779464972           | 40.36   | 1.196E+03  | 11.88549027           | 56.18   | 1.924E+03  | 19.38097612           |
| 35.025  | 6.085E+02  | 5.958949755           | 50.45   | 1.089E+03  | 10.67610034           | 70.225  | 1.791E+03  | 17.76595697           |
| 42.03   | 5.473E+02  | 5.318336723           | 60.54   | 9.990E+02  | 9.694326002           | 84.27   | 1.675E+03  | 16.40421513           |
| 56.04   | 4.551E+02  | 4.382195149           | 80.72   | 8.567E+02  | 8.196505818           | 112.36  | 1.480E+03  | 14.23712986           |
| 70.05   | 3.892E+02  | 3.730624736           | 100.9   | 7.488E+02  | 7.106171877           | 140.45  | 1.323E+03  | 12.58784461           |
| 84.06   | 3.401E+02  | 3.25079386            | 121.08  | 6.647E+02  | 6.275960565           | 168.54  | 1.197E+03  | 11.2884363            |
| 98.07   | 3.023E+02  | 2.882637577           | 141.26  | 5.974E+02  | 5.622254695           | 196.63  | 1.092E+03  | 10.23687713           |
| 112.08  | 2.722E+02  | 2.591212172           | 161.44  | 5.425E+02  | 5.0939491             | 224.72  | 1.004E+03  | 9.367813973           |
| 126.09  | 2.477E+02  | 2.354767261           | 181.62  | 4.969E+02  | 4.658113194           | 252.81  | 9.285E+02  | 8.637001489           |
| 140.1   | 2.275E+02  | 2.159062421           | 201.8   | 4.586E+02  | 4.292315856           | 280.9   | 8.639E+02  | 8.01367816            |
| 210.15  | 1.633E+02  | 1.533563112           | 302.7   | 3.325E+02  | 3.092445697           | 421.35  | 6.417E+02  | 5.900987849           |
| 280.2   | 1.288E+02  | 1.196236046           | 403.6   | 2.630E+02  | 2.426766821           | 561.8   | 5.125E+02  | 4.681362748           |
| 350.25  | 1.074E+02  | 0.984670073           | 504.5   | 2.191E+02  | 2.003057123           | 702.25  | 4.285E+02  | 3.88714775            |
| 420.3   | 9.255E+01  | 0.839103924           | 605.4   | 1.888E+02  | 1.709306117           | 842.7   | 3.698E+02  | 3.328674125           |
| 560.4   | 7.339E+01  | 0.651050721           | 807.2   | 1.496E+02  | 1.327806007           | 1123.6  | 2.932E+02  | 2.594789753           |
| 700.5   | 6.144E+01  | 0.53424304            | 1009    | 1.252E+02  | 1.089976063           | 1404.5  | 2.453E+02  | 2.133307291           |
| 840.6   | 5.322E+01  | 0.454309446           | 1210.8  | 1.085E+02  | 0.927028912           | 1685.4  | 2.125E+02  | 1.815685811           |
| 980.7   | 4.722E+01  | 0.396004851           | 1412.6  | 9.627E+01  | 0.808106285           | 1966.3  | 1.885E+02  | 1.583293696           |
| 1120.8  | 4.261E+01  | 0.3515073             | 1614.4  | 8.692E+01  | 0.717311845           | 2247.2  | 1.703E+02  | 1.405674712           |
| 1260.9  | 3.898E+01  | 0.316373074           | 1816.2  | 7.953E+01  | 0.645629984           | 2528.1  | 1.558E+02  | 1.265343637           |
| 1401    | 3.604E+01  | 0.287890604           | 2018    | 7.353E+01  | 0.587519284           | 2809    | 1.441E+02  | 1.15143851            |
| 2101.5  | 2.695E+01  | 0.200026704           | 3027    | 5.503E+01  | 0.408216681           | 4213.5  | 1.080E+02  | 0.800056962           |
| 2802    | 2.225E+01  | 0.154323805           | 4036    | 4.546E+01  | 0.314948234           | 5618    | 8.924E+01  | 0.617286842           |
| 3502.5  | 1.938E+01  | 0.12613055            | 5045    | 3.961E+01  | 0.257411148           | 7022.5  | 7.780E+01  | 0.504531686           |
| 4203    | 1.746E+01  | 0.106929321           | 6054    | 3.569E+01  | 0.218220773           | 8427    | 7.012E+01  | 0.427730791           |
| 5604    | 1.504E+01  | 0.082350944           | 8072    | 3.077E+01  | 0.168061087           | 11236   | 6.049E+01  | 0.329410927           |
| 7005    | 1.362E+01  | 0.067217128           | 10090   | 2.786E+01  | 0.137180088           | 14045   | 5.479E+01  | 0.268872129           |
| 8406    | 1.269E+01  | 0.056923854           | 12108   | 2.597E+01  | 0.116173839           | 16854   | 5.109E+01  | 0.227697469           |
| 9807    | 1.206E+01  | 0.049450969           | 14126   | 2.467E+01  | 0.100924184           | 19663   | 4.852E+01  | 0.197804778           |
| 11208   | 1.160E+01  | 0.043769477           | 16144   | 2.373E+01  | 0.089329041           | 22472   | 4.669E+01  | 0.175077467           |
| 12609   | 1.126E+01  | 0.039298267           | 18162   | 2.303E+01  | 0.080202669           | 25281   | 4.533E+01  | 0.157192434           |
| 14010   | 1.100E+01  | 0.035684273           | 20180   | 2.250E+01  | 0.072826219           | 28090   | 4.429E+01  | 0.142735249           |

| 12C         |            |               | protons     |            |               |
|-------------|------------|---------------|-------------|------------|---------------|
| T (Mev)     | Se (eV/nm) | dNe/dz(e-/nm) | T (Mev)     | Se (eV/nm) | dNe/dz(e-/nm) |
| 0.0010      | 1.177E+02  | 2.742E-09     | 0.0010      | 1.765E+01  | 1.081E-05     |
| 0.0015      | 1.251E+02  | 1.383E-08     | 0.0015      | 1.980E+01  | 4.614E-05     |
| 0.0020      | 1.294E+02  | 4.323E-08     | 0.0020      | 2.180E+01  | 1.243E-04     |
| 0.0030      | 1.339E+02  | 2.130E-07     | 0.0030      | 2.539E+01  | 4.715E-04     |
| 0.0040      | 1.361E+02  | 6.536E-07     | 0.0040      | 2.858E+01  | 1.156E-03     |
| 0.0050      | 1.371E+02  | 1.549E-06     | 0.0050      | 3.147E+01  | 2.249E-03     |
| 0.0060      | 1.378E+02  | 3.117E-06     | 0.0060      | 3.413E+01  | 3.797E-03     |
| 0.0080      | 1.386E+02  | 9.288E-06     | 0.0080      | 3.892E+01  | 8.366E-03     |
| 0.0100      | 1.392E+02  | 2.142E-05     | 0.0100      | 4.320E+01  | 1.499E-02     |
| 0.0150      | 1.410E+02  | 9.473E-05     | 0.0150      | 5.100E+01  | 4.075E-02     |
| 0.0200      | 1.434E+02  | 2.641E-04     | 0.0200      | 5.721E+01  | 8.015E-02     |
| 0.0300      | 1.493E+02  | 1.065E-03     | 0.0300      | 6.658E+01  | 2.075E-01     |
| 0.0400      | 1.561E+02  | 2.749E-03     | 0.0400      | 7.309E+01  | 4.168E-01     |
| 0.0500      | 1.631E+02  | 5.593E-03     | 0.0500      | 7.753E+01  | 6.549E-01     |
| 0.0600      | 1.702E+02  | 9.822E-03     | 0.0600      | 8.035E+01  | 8.187E-01     |
| 0.0800      | 1.843E+02  | 2.313E-02     | 0.0800      | 8.244E+01  | 9.572E-01     |
| 0.1000      | 1.984E+02  | 4.375E-02     | 0.1000      | 8.145E+01  | 9.849E-01     |
| 0.1500      | 2.334E+02  | 1.320E-01     | 0.1500      | 7.357E+01  | 9.270E-01     |
| 0.2000      | 2.668E+02  | 2.794E-01     | 0.2000      | 6.581E+01  | 8.385E-01     |
| 0.3000      | 3.271E+02  | 7.915E-01     | 0.3000      | 5.430E+01  | 6.883E-01     |
| 0.4000      | 3.806E+02  | 1.700E+00     | 0.4000      | 4.639E+01  | 5.804E-01     |
| 0.5000      | 4.289E+02  | 3.107E+00     | 0.5000      | 4.061E+01  | 5.016E-01     |
| 0.6000      | 4.730E+02  | 4.705E+00     | 0.6000      | 3.620E+01  | 4.420E-01     |
| 0.8000      | 5.504E+02  | 7.019E+00     | 0.8000      | 2.994E+01  | 3.582E-01     |
| 1.0000      | 6.162E+02  | 8.316E+00     | 1.0000      | 2.572E+01  | 3.022E-01     |
| 1.5000      | 7.391E+02  | 9.772E+00     | 1.5000      | 1.932E+01  | 2.194E-01     |
| 2.0000      | 8.156E+02  | 1.027E+01     | 2.0000      | 1.567E+01  | 1.737E-01     |
| 3.0000      | 8.797E+02  | 1.040E+01     | 3.0000      | 1.159E+01  | 1.242E-01     |
| 4.0000      | 8.710E+02  | 1.014E+01     | 4.0000      | 9.306E+00  | 9.760E-02     |
| 5.0000      | 8.370E+02  | 9.788E+00     | 5.0000      | 7.831E+00  | 8.083E-02     |
| 6.0000      | 8.026E+02  | 9.410E+00     | 6.0000      | 6.791E+00  | 6.923E-02     |
| 8.0000      | 7.418E+02  | 8.683E+00     | 8.0000      | 5.409E+00  | 5.413E-02     |
| 10.0000     | 6.920E+02  | 8.035E+00     | 10.0000     | 4.526E+00  | 4.467E-02     |
| 15.0000     | 5.974E+02  | 6.754E+00     | 15.0000     | 3.264E+00  | 3.144E-02     |
| 20.0000     | 5.278E+02  | 5.822E+00     | 20.0000     | 2.586E+00  | 2.446E-02     |
| 30.0000     | 4.291E+02  | 4.569E+00     | 30.0000     | 1.861E+00  | 1.713E-02     |
| 40.0000     | 3.623E+02  | 3.766E+00     | 40.0000     | 1.476E+00  | 1.329E-02     |
| 50.0000     | 3.130E+02  | 3.207E+00     | 50.0000     | 1.236E+00  | 1.090E-02     |
| 60.0000     | 2.746E+02  | 2.795E+00     | 60.0000     | 1.070E+00  | 9.272E-03     |
| 80.0000     | 2.204E+02  | 2.228E+00     | 80.0000     | 8.563E-01  | 7.174E-03     |
| 100.0000    | 1.852E+02  | 1.857E+00     | 100.0000    | 7.236E-01  | 5.875E-03     |
| 150.0000    | 1.344E+02  | 1.320E+00     | 150.0000    | 5.409E-01  | 4.082E-03     |
| 200.0000    | 1.068E+02  | 1.031E+00     | 200.0000    | 4.461E-01  | 3.149E-03     |
| 300.0000    | 7.706E+01  | 7.237E-01     | 300.0000    | 3.503E-01  | 2.182E-03     |
| 400.0000    | 6.115E+01  | 5.619E-01     | 400.0000    | 3.014E-01  | 1.681E-03     |
| 500.0000    | 5.116E+01  | 4.614E-01     | 500.0000    | 2.725E-01  | 1.372E-03     |
| 600.0000    | 4.427E+01  | 3.925E-01     | 600.0000    | 2.545E-01  | 1.162E-03     |
| 800.0000    | 3.535E+01  | 3.039E-01     | 800.0000    | 2.315E-01  | 8.933E-04     |
| 1000.0000   | 2.979E+01  | 2.490E-01     | 1000.0000   | 2.196E-01  | 7.283E-04     |
| 1500.0000   | 2.210E+01  | 1.731E-01     | 1500.0000   | 2.066E-01  | 5.020E-04     |
| 2000.0000   | 1.810E+01  | 1.337E-01     | 2000.0000   | 2.016E-01  | 3.853E-04     |
| 3000.0000   | 1.399E+01  | 9.267E-02     | 3000.0000   | 1.996E-01  | 2.651E-04     |
| 4000.0000   | 1.191E+01  | 7.140E-02     | 4000.0000   | 2.006E-01  | 2.032E-04     |
| 5000.0000   | 1.066E+01  | 5.830E-02     | 5000.0000   | 2.026E-01  | 1.653E-04     |
| 6000.0000   | 9.842E+00  | 4.938E-02     | 6000.0000   | 2.046E-01  | 1.396E-04     |
| 8000.0000   | 8.851E+00  | 3.799E-02     | 8000.0000   | 2.086E-01  | 1.069E-04     |
| 10 000.0000 | 8.295E+00  | 3.098E-02     | 10 000.0000 | 2.126E-01  | 8.689E-05     |

| <b><sup>56</sup>Fe</b> |                   |                      |                |                   |                      |                |                   |                      |
|------------------------|-------------------|----------------------|----------------|-------------------|----------------------|----------------|-------------------|----------------------|
| <b>T (Mev)</b>         | <b>Se (eV/nm)</b> | <b>dNe/dζ(e-/nm)</b> | <b>T (Mev)</b> | <b>Se (eV/nm)</b> | <b>dNe/dζ(e-/nm)</b> | <b>T (Mev)</b> | <b>Se (eV/nm)</b> | <b>dNe/dζ(e-/nm)</b> |
| 0.01                   | 3.96E+01          | 1.54E-07             | 1.6            | 5.91E+02          | 3.53E+00             | 275            | 3.35E+03          | 3.24E+01             |
| 0.011                  | 4.15E+01          | 2.25E-07             | 1.7            | 6.18E+02          | 4.18E+00             | 300            | 3.25E+03          | 3.12E+01             |
| 0.012                  | 4.33E+01          | 3.16E-07             | 1.8            | 6.45E+02          | 4.90E+00             | 325            | 3.16E+03          | 3.02E+01             |
| 0.013                  | 4.51E+01          | 4.33E-07             | 2              | 7.00E+02          | 6.60E+00             | 350            | 3.07E+03          | 2.92E+01             |
| 0.014                  | 4.68E+01          | 5.78E-07             | 2.25           | 7.66E+02          | 9.18E+00             | 375            | 2.99E+03          | 2.83E+01             |
| 0.015                  | 4.85E+01          | 7.57E-07             | 2.5            | 8.34E+02          | 1.21E+01             | 400            | 2.91E+03          | 2.74E+01             |
| 0.016                  | 5.01E+01          | 9.74E-07             | 2.75           | 9.02E+02          | 1.50E+01             | 450            | 2.76E+03          | 2.58E+01             |
| 0.017                  | 5.16E+01          | 1.23E-06             | 3              | 9.71E+02          | 1.78E+01             | 500            | 2.62E+03          | 2.45E+01             |
| 0.018                  | 5.31E+01          | 1.54E-06             | 3.25           | 1.04E+03          | 2.02E+01             | 550            | 2.50E+03          | 2.32E+01             |
| 0.02                   | 5.60E+01          | 2.32E-06             | 3.5            | 1.11E+03          | 2.23E+01             | 600            | 2.39E+03          | 2.21E+01             |
| 0.0225                 | 5.94E+01          | 3.66E-06             | 3.75           | 1.18E+03          | 2.42E+01             | 650            | 2.28E+03          | 2.11E+01             |
| 0.025                  | 6.26E+01          | 5.49E-06             | 4              | 1.26E+03          | 2.58E+01             | 700            | 2.17E+03          | 2.02E+01             |
| 0.0275                 | 6.57E+01          | 7.91E-06             | 4.5            | 1.40E+03          | 2.85E+01             | 800            | 1.99E+03          | 1.85E+01             |
| 0.03                   | 6.86E+01          | 1.10E-05             | 5              | 1.55E+03          | 3.08E+01             | 900            | 1.83E+03          | 1.72E+01             |
| 0.0325                 | 7.14E+01          | 1.50E-05             | 5.5            | 1.70E+03          | 3.26E+01             | 1000           | 1.69E+03          | 1.60E+01             |
| 0.035                  | 7.41E+01          | 1.98E-05             | 6              | 1.84E+03          | 3.41E+01             | 1100           | 1.57E+03          | 1.50E+01             |
| 0.0375                 | 7.66E+01          | 2.57E-05             | 6.5            | 1.99E+03          | 3.55E+01             | 1200           | 1.47E+03          | 1.41E+01             |
| 0.04                   | 7.91E+01          | 3.28E-05             | 7              | 2.13E+03          | 3.66E+01             | 1300           | 1.38E+03          | 1.33E+01             |
| 0.045                  | 8.39E+01          | 5.11E-05             | 8              | 2.40E+03          | 3.85E+01             | 1400           | 1.31E+03          | 1.25E+01             |
| 0.05                   | 8.85E+01          | 7.56E-05             | 9              | 2.65E+03          | 4.01E+01             | 1500           | 1.25E+03          | 1.19E+01             |
| 0.055                  | 9.28E+01          | 1.08E-04             | 10             | 2.88E+03          | 4.13E+01             | 1600           | 1.21E+03          | 1.13E+01             |
| 0.06                   | 9.69E+01          | 1.48E-04             | 11             | 3.09E+03          | 4.23E+01             | 1700           | 1.17E+03          | 1.08E+01             |
| 0.065                  | 1.01E+02          | 1.99E-04             | 12             | 3.28E+03          | 4.32E+01             | 1800           | 1.12E+03          | 1.03E+01             |
| 0.07                   | 1.05E+02          | 2.60E-04             | 13             | 3.45E+03          | 4.39E+01             | 2000           | 1.04E+03          | 9.51E+00             |
| 0.08                   | 1.12E+02          | 4.21E-04             | 14             | 3.60E+03          | 4.45E+01             | 2250           | 9.49E+02          | 8.64E+00             |
| 0.09                   | 1.19E+02          | 6.41E-04             | 15             | 3.73E+03          | 4.50E+01             | 2500           | 8.79E+02          | 7.93E+00             |
| 0.1                    | 1.25E+02          | 9.29E-04             | 16             | 3.85E+03          | 4.55E+01             | 2750           | 8.19E+02          | 7.32E+00             |
| 0.11                   | 1.32E+02          | 1.30E-03             | 17             | 3.96E+03          | 4.59E+01             | 3000           | 7.68E+02          | 6.80E+00             |
| 0.12                   | 1.45E+02          | 1.75E-03             | 18             | 4.05E+03          | 4.62E+01             | 3250           | 7.25E+02          | 6.35E+00             |
| 0.13                   | 1.57E+02          | 2.31E-03             | 20             | 4.20E+03          | 4.68E+01             | 3500           | 6.87E+02          | 5.96E+00             |
| 0.14                   | 1.65E+02          | 2.97E-03             | 22.5           | 4.35E+03          | 4.73E+01             | 3750           | 6.53E+02          | 5.62E+00             |
| 0.15                   | 1.71E+02          | 3.74E-03             | 25             | 4.45E+03          | 4.76E+01             | 4000           | 6.22E+02          | 5.31E+00             |
| 0.16                   | 1.75E+02          | 4.64E-03             | 27.5           | 4.53E+03          | 4.79E+01             | 4500           | 5.69E+02          | 4.79E+00             |
| 0.17                   | 1.79E+02          | 5.68E-03             | 30             | 4.59E+03          | 4.80E+01             | 5000           | 5.26E+02          | 4.37E+00             |
| 0.18                   | 1.81E+02          | 6.85E-03             | 32.5           | 4.64E+03          | 4.81E+01             | 5500           | 4.90E+02          | 4.01E+00             |
| 0.2                    | 1.85E+02          | 9.65E-03             | 35             | 4.67E+03          | 4.81E+01             | 6000           | 4.59E+02          | 3.72E+00             |
| 0.225                  | 1.89E+02          | 1.41E-02             | 37.5           | 4.69E+03          | 4.81E+01             | 6500           | 4.33E+02          | 3.46E+00             |
| 0.25                   | 1.93E+02          | 1.96E-02             | 40             | 4.71E+03          | 4.80E+01             | 7000           | 4.11E+02          | 3.24E+00             |
| 0.275                  | 1.97E+02          | 2.64E-02             | 45             | 4.72E+03          | 4.78E+01             | 8000           | 3.74E+02          | 2.87E+00             |
| 0.3                    | 2.02E+02          | 3.45E-02             | 50             | 4.72E+03          | 4.76E+01             | 9000           | 3.45E+02          | 2.59E+00             |
| 0.325                  | 2.08E+02          | 4.40E-02             | 55             | 4.70E+03          | 4.73E+01             | 10000          | 3.21E+02          | 2.35E+00             |
| 0.35                   | 2.14E+02          | 5.49E-02             | 60             | 4.68E+03          | 4.69E+01             | 11000          | 3.02E+02          | 2.16E+00             |
| 0.375                  | 2.20E+02          | 6.74E-02             | 65             | 4.65E+03          | 4.65E+01             | 12000          | 2.85E+02          | 2.00E+00             |
| 0.4                    | 2.27E+02          | 8.14E-02             | 70             | 4.61E+03          | 4.61E+01             | 13000          | 2.71E+02          | 1.86E+00             |
| 0.45                   | 2.42E+02          | 1.15E-01             | 80             | 4.53E+03          | 4.53E+01             | 14000          | 2.59E+02          | 1.74E+00             |
| 0.5                    | 2.56E+02          | 1.55E-01             | 90             | 4.44E+03          | 4.44E+01             | 15000          | 2.50E+02          | 1.63E+00             |
| 0.55                   | 2.73E+02          | 2.02E-01             | 100            | 4.36E+03          | 4.36E+01             | 16000          | 2.41E+02          | 1.54E+00             |
| 0.6                    | 2.89E+02          | 2.57E-01             | 110            | 4.27E+03          | 4.28E+01             | 17000          | 2.33E+02          | 1.46E+00             |
| 0.65                   | 3.05E+02          | 3.20E-01             | 120            | 4.25E+03          | 4.20E+01             | 18000          | 2.26E+02          | 1.38E+00             |
| 0.7                    | 3.22E+02          | 3.92E-01             | 130            | 4.22E+03          | 4.12E+01             | 20000          | 2.13E+02          | 1.26E+00             |
| 0.8                    | 3.54E+02          | 5.60E-01             | 140            | 4.14E+03          | 4.04E+01             | 22500          | 2.01E+02          | 1.13E+00             |
| 0.9                    | 3.86E+02          | 7.66E-01             | 150            | 4.06E+03          | 3.97E+01             | 25000          | 1.92E+02          | 1.03E+00             |
| 1                      | 4.17E+02          | 1.01E+00             | 160            | 3.98E+03          | 3.90E+01             | 27500          | 1.84E+02          | 9.40E-01             |
| 1.1                    | 4.48E+02          | 1.30E+00             | 170            | 3.91E+03          | 3.83E+01             | 30000          | 1.77E+02          | 8.69E-01             |
| 1.2                    | 4.77E+02          | 1.64E+00             | 180            | 3.84E+03          | 3.77E+01             | 32500          | 1.72E+02          | 8.08E-01             |
| 1.3                    | 5.06E+02          | 2.02E+00             | 200            | 3.72E+03          | 3.64E+01             | 35000          | 1.67E+02          | 7.55E-01             |
| 1.4                    | 5.35E+02          | 2.46E+00             | 225            | 3.58E+03          | 3.49E+01             | 37500          | 1.64E+02          | 7.09E-01             |
| 1.5                    | 5.63E+02          | 2.97E+00             | 250            | 3.46E+03          | 3.36E+01             | 40000          | 1.60E+02          | 6.68E-01             |

## References

139. Lindhard, J. On the properties of a gas of charged particles. *Dan. Vid. Selsk Mat.-Fys. Medd.* **1954**, *28*, 8.
150. International Commission on Radiation Units and Measurements. Key Data For Ionizing - Radiation Dosimetry: Measurement Standards And Applications (Report 90). *J Int Comm Radiat Units Meas* **2014**, *14*, 79-80.
151. Bimbot, R.; Geissel, H.; Paul, H.; Shinner, A.; Sigmund, P. Stopping of ions heavier than helium ICRU Report 73. Oxford: Oxford University Press: 2005.
152. Zeigler, J.; Ziegler, M.; Biersack, J. SRIM 2008. 04 software package. 2008. Available online: <http://www.srim.org> (accessed on 9-9-20).

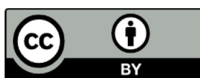

© 2021 by the authors. Licensee MDPI, Basel, Switzerland. This article is an open access article distributed under the terms and conditions of the Creative Commons Attribution (CC BY) license (<http://creativecommons.org/licenses/by/4.0/>).
